# Supplementary material
Source: MDPI journal article supplement (https://www.mdpi.com/2312-7481/8/9/95)
Supplement: s1 [file s1]

## Supporting Information

### Solvothermal One-Pot Synthesis of a New Family of Chiral [Fe<sub>4</sub>O<sub>4</sub>]-Cubane Clusters with Redox Active Cores

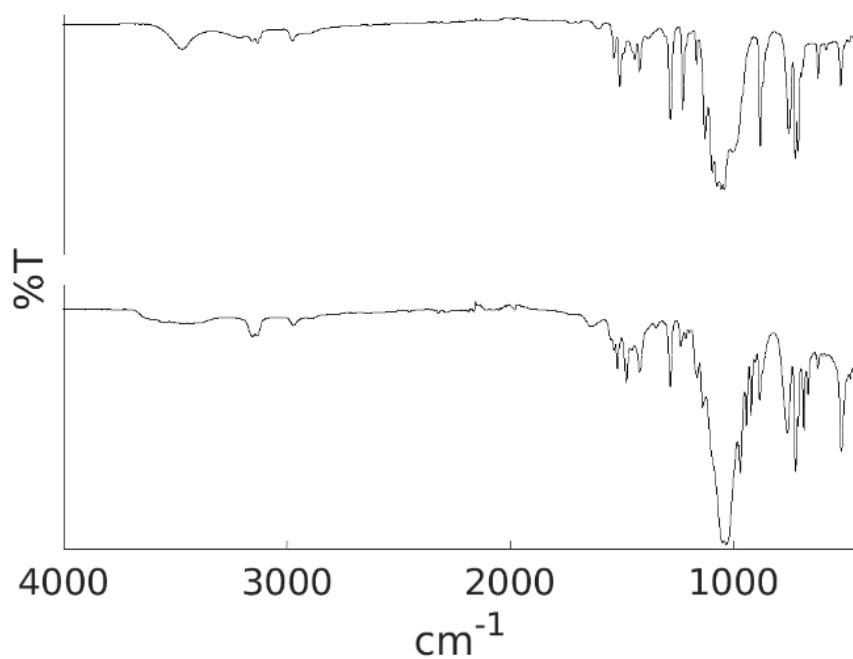

**Figure S1.** Mid-range infrared spectrum of **2** (top) and **4** (bottom).

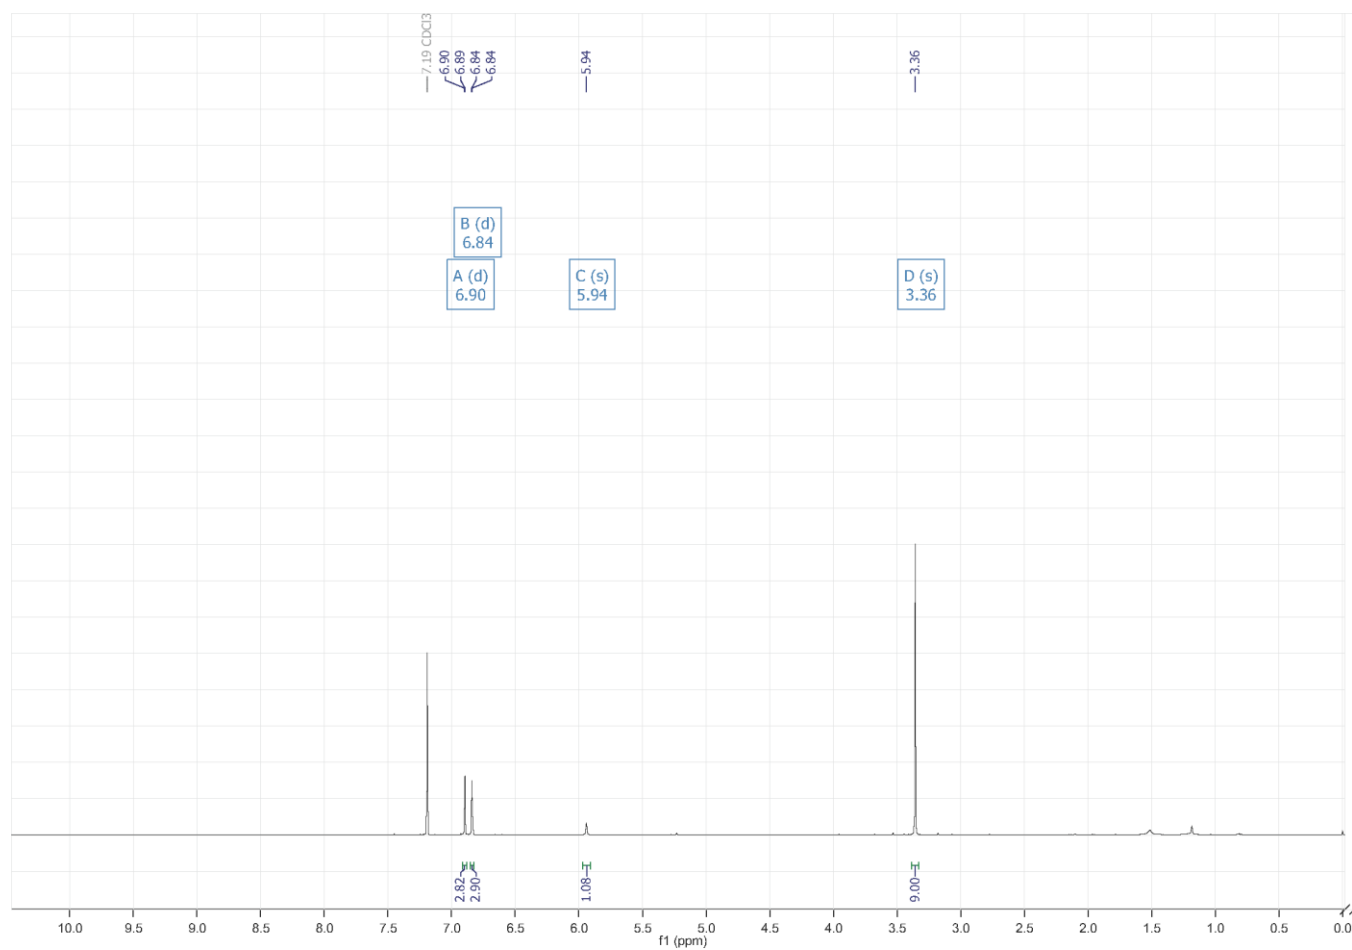

**Figure S2.**  $^1\text{H}$  NMR (400 MHz,  $\text{CDCl}_3$ ), tris(1-methyl-1H-imidazol-2-yl)methanol ((mim) $_3$ COH).

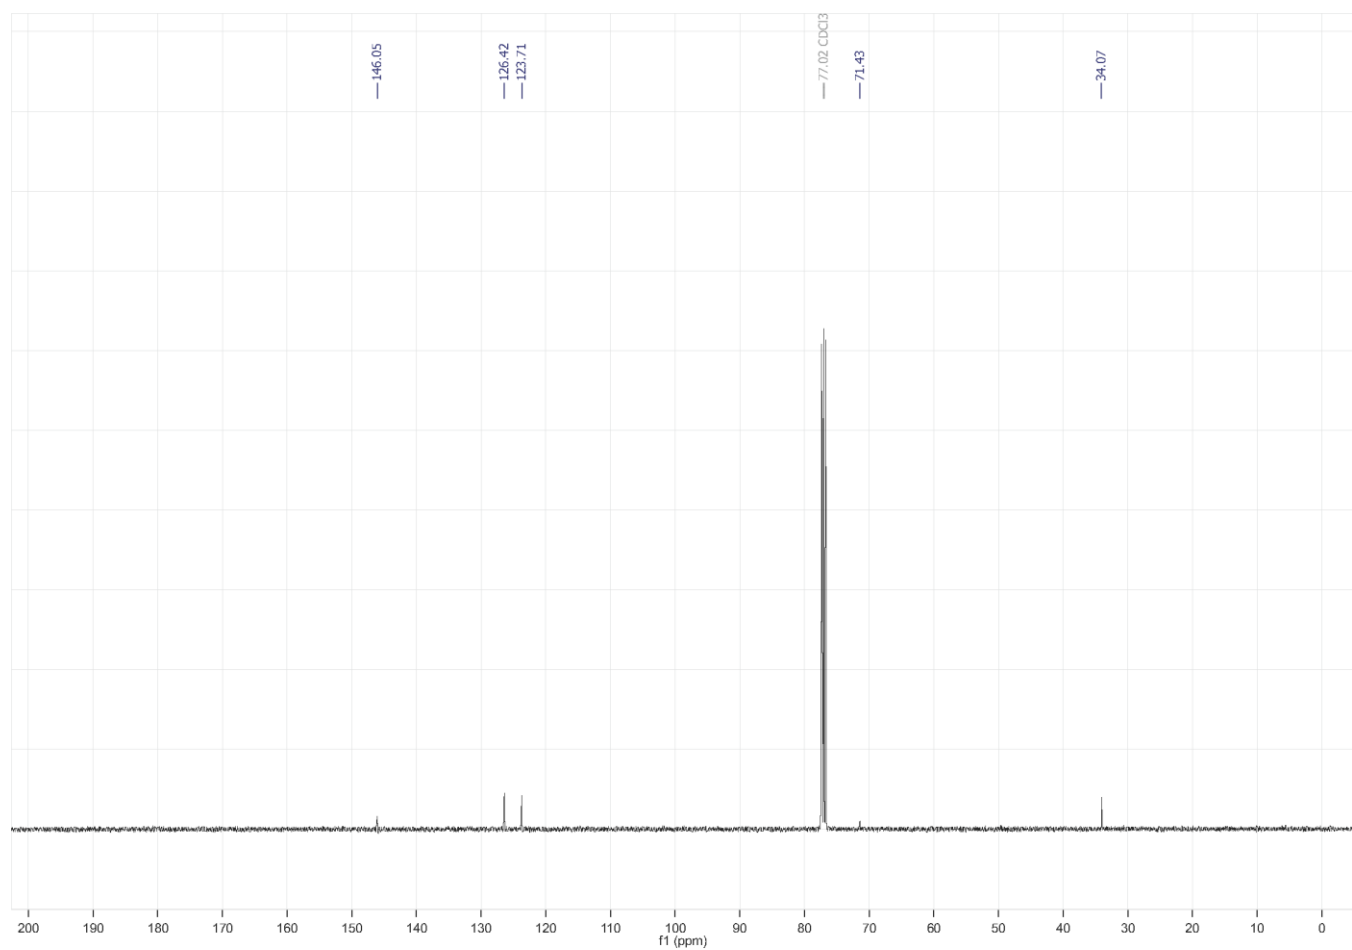

**Figure S3.**  $^{13}\text{C}$  NMR (101 MHz,  $\text{CDCl}_3$ ), tris(1-methyl-1H-imidazol-2-yl)methanol ((mim) $_3$ COH).

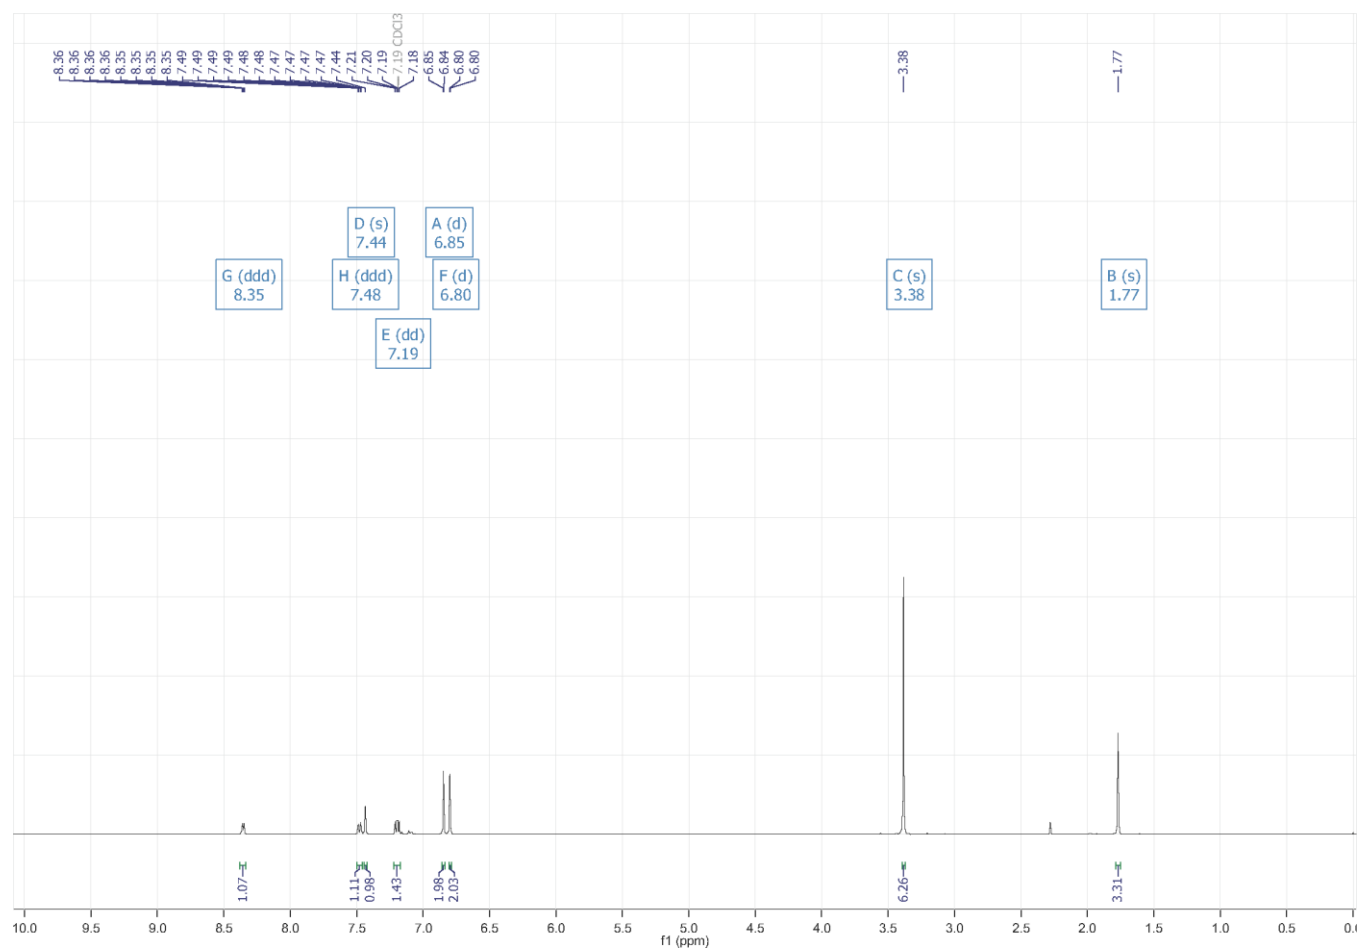

**Figure S4.** <sup>1</sup>H NMR (400 MHz, CDCl<sub>3</sub>) , bis(1-methyl-1H-imidazol-2-yl)(3-methylpyridin-2-yl)methanol.

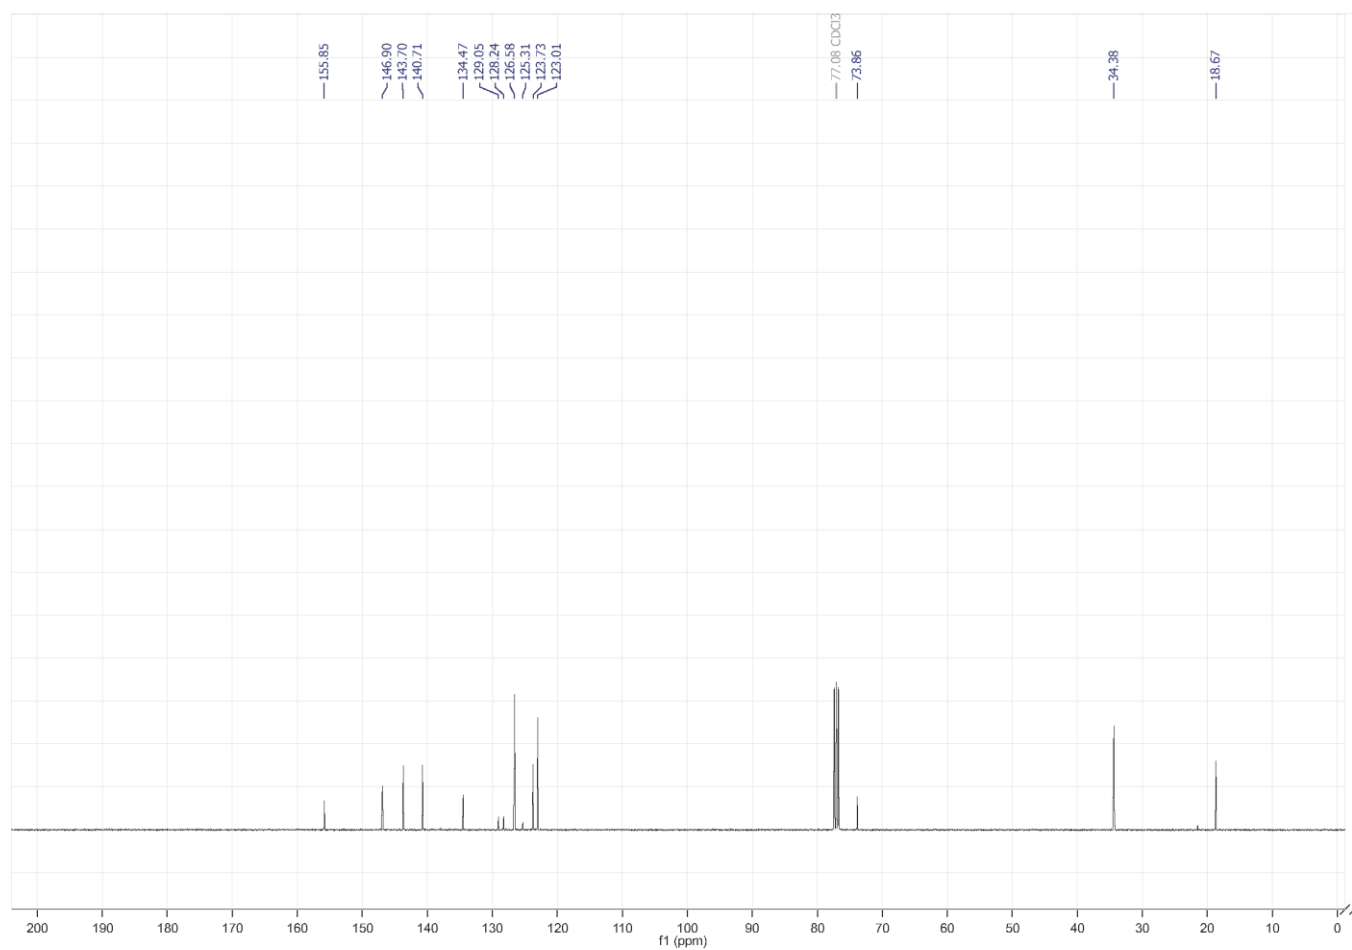

**Figure S5.** <sup>13</sup>C NMR (101 MHz, CDCl<sub>3</sub>), bis(1-methyl-1*H*-imidazol-2-yl)(3-methylpyridin-2-yl)methanol.
